# Supplementary material for: An amine protecting group deprotectable under nearly neutral oxidative conditions
Source: publisher site journal article supplement (doi:10.3762/bjoc.14.149), 2018-07-13

**Supporting Information**  
**for**  
**An amine protecting group deprotectable under nearly**  
**neutral oxidative conditions**

Shahien Shahsavari<sup>1</sup>, Chase McNamara<sup>1</sup>, Mark Sylvester<sup>1</sup>, Emily Bromley<sup>1</sup>, Savannah Joslin<sup>1</sup>, Bao-Yuan Lu<sup>2</sup> and Shiyue Fang<sup>\*1</sup>

Address: <sup>1</sup>Department of Chemistry, Michigan Technological University, 1400 Townsend Drive, Houghton, MI 49931, USA and <sup>2</sup>Nalco Champion, an Ecolab Company, 11177 S. Stadium Drive, Sugar Land, TX 77478, USA

Email: Shiyue Fang - shifang@mtu.edu

\*Corresponding author

**Images of <sup>1</sup>H and <sup>13</sup>C NMR spectra of new compounds**  
**including 5a–i and 7–9**

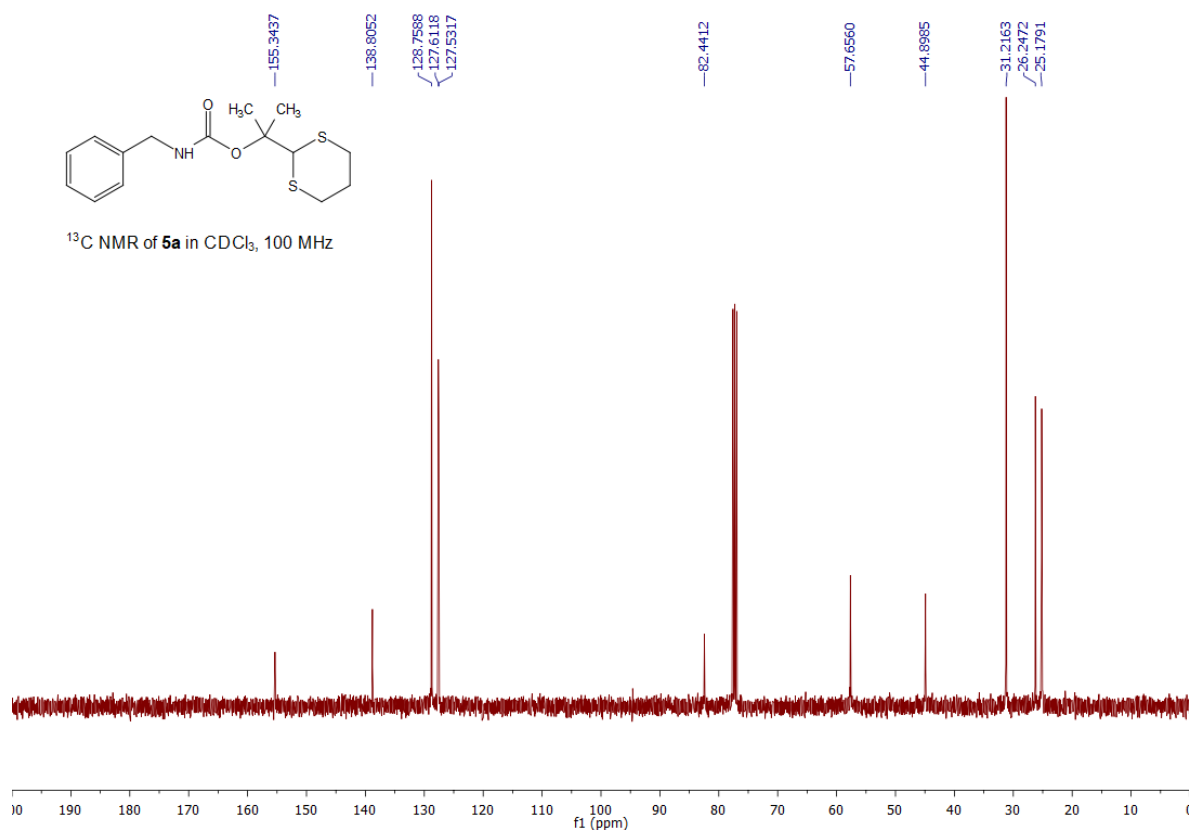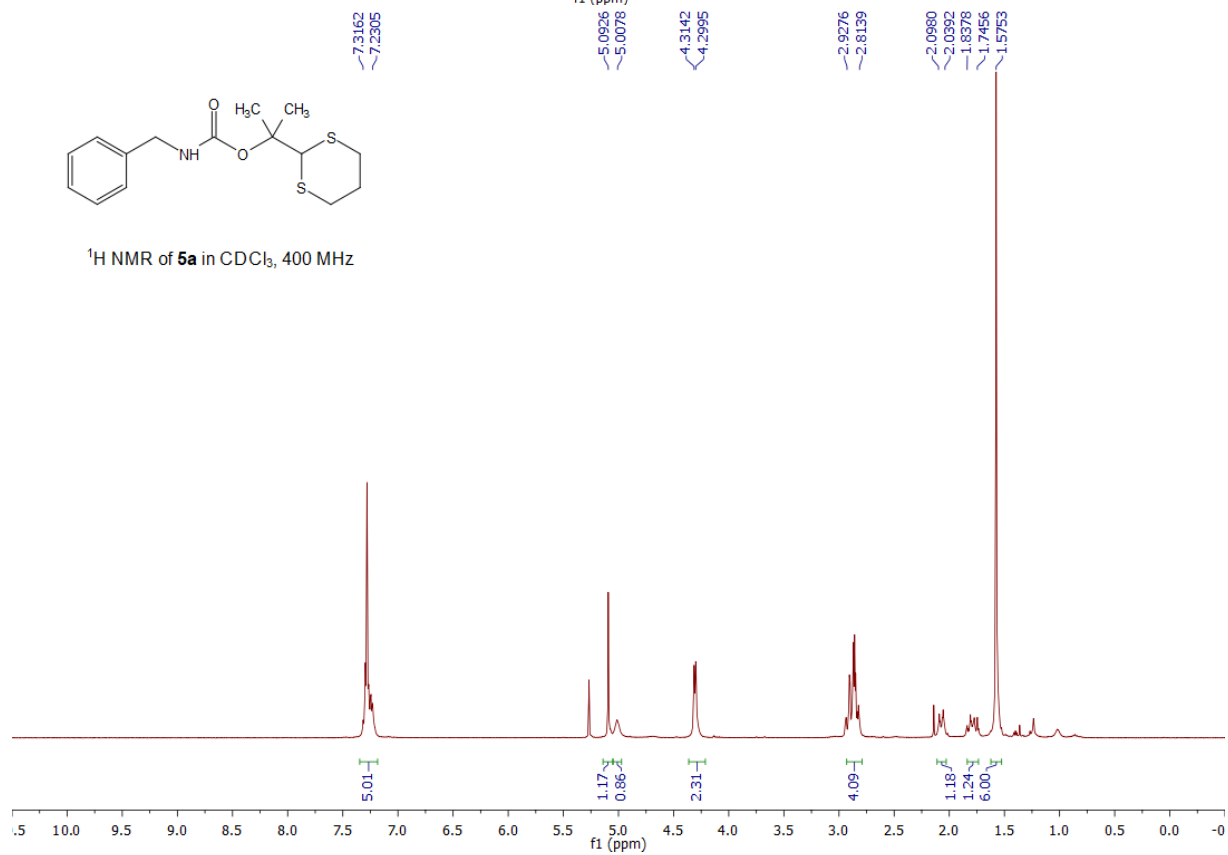

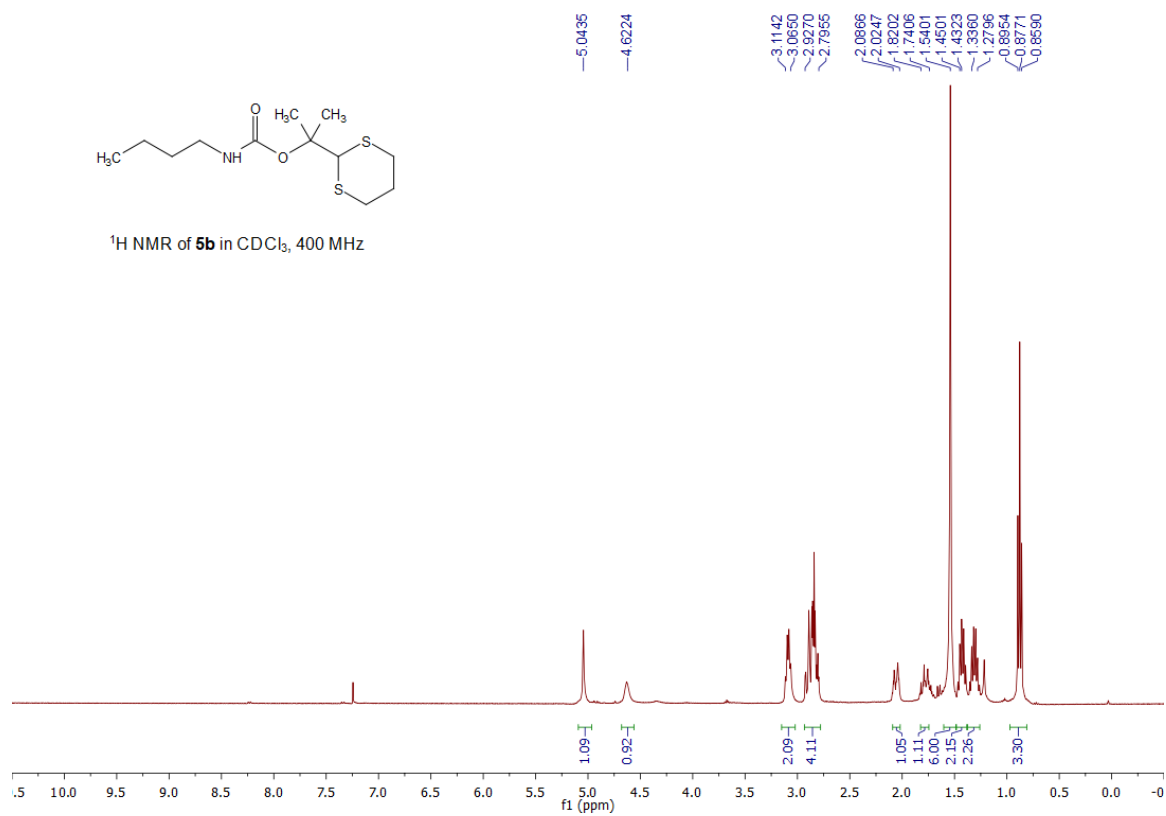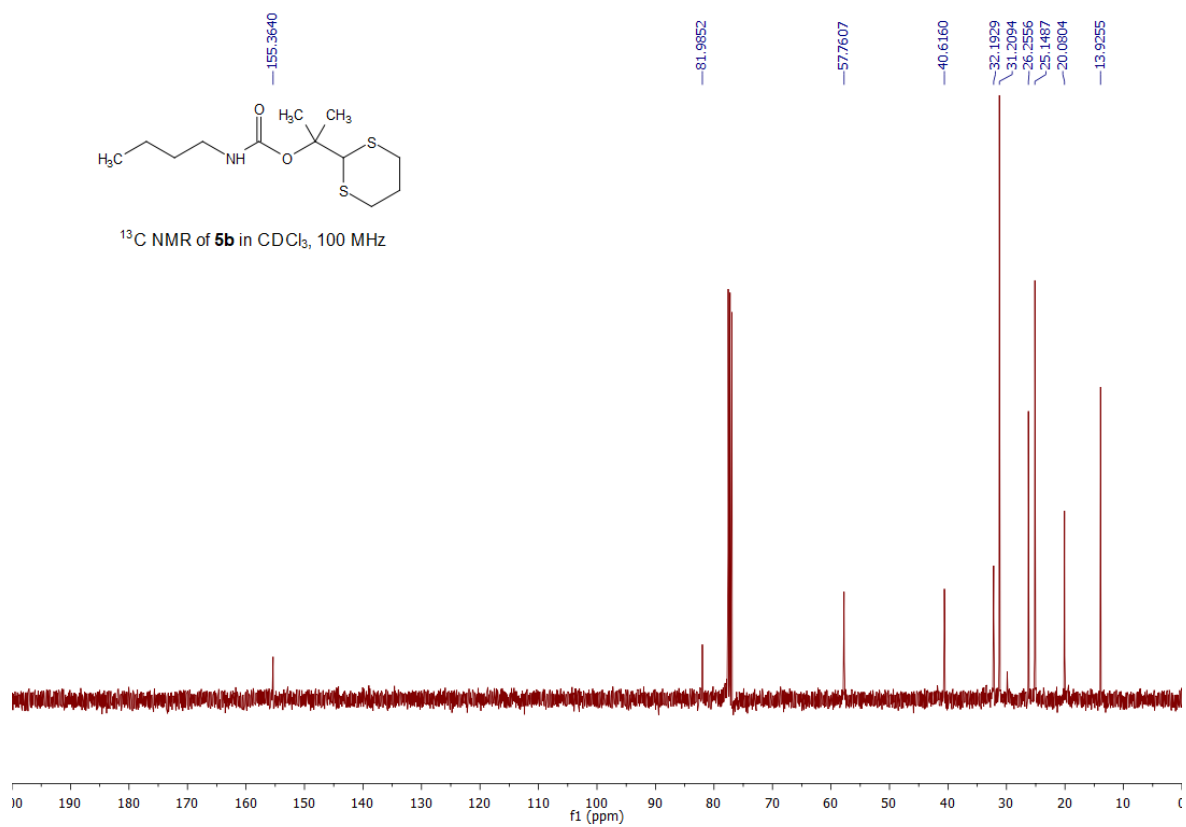

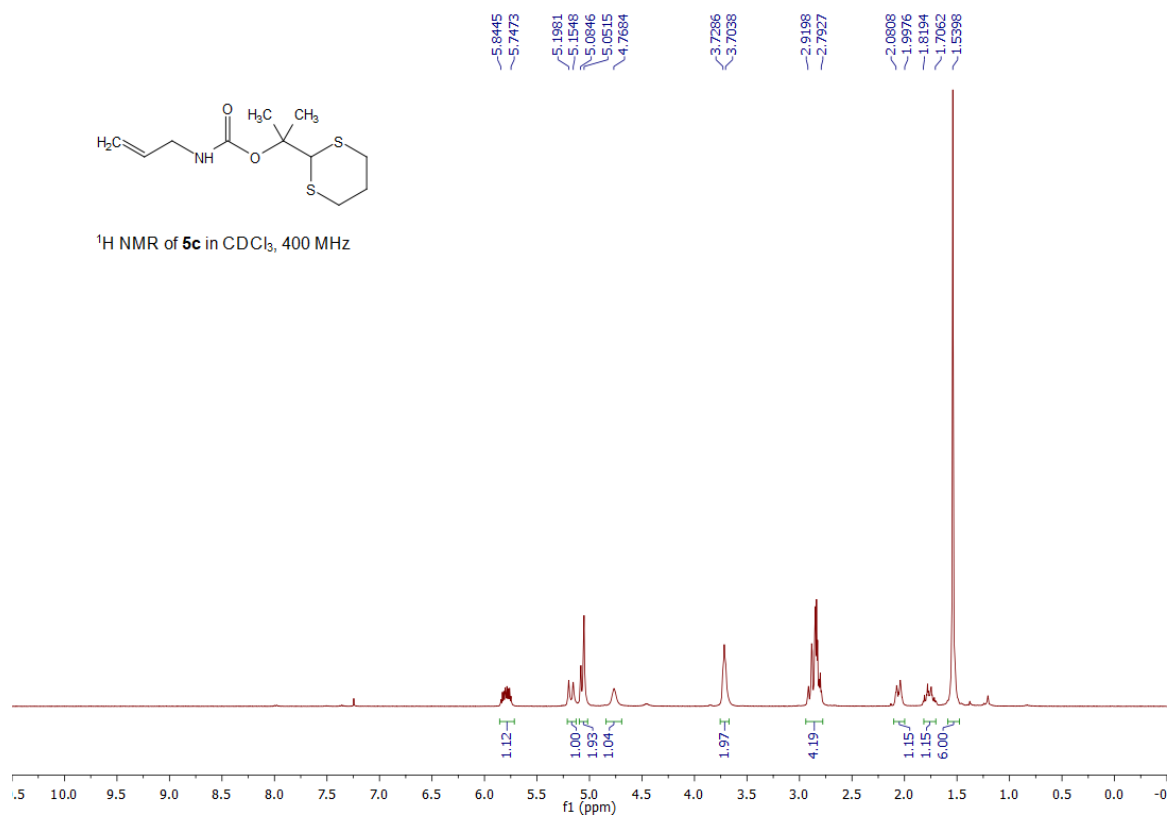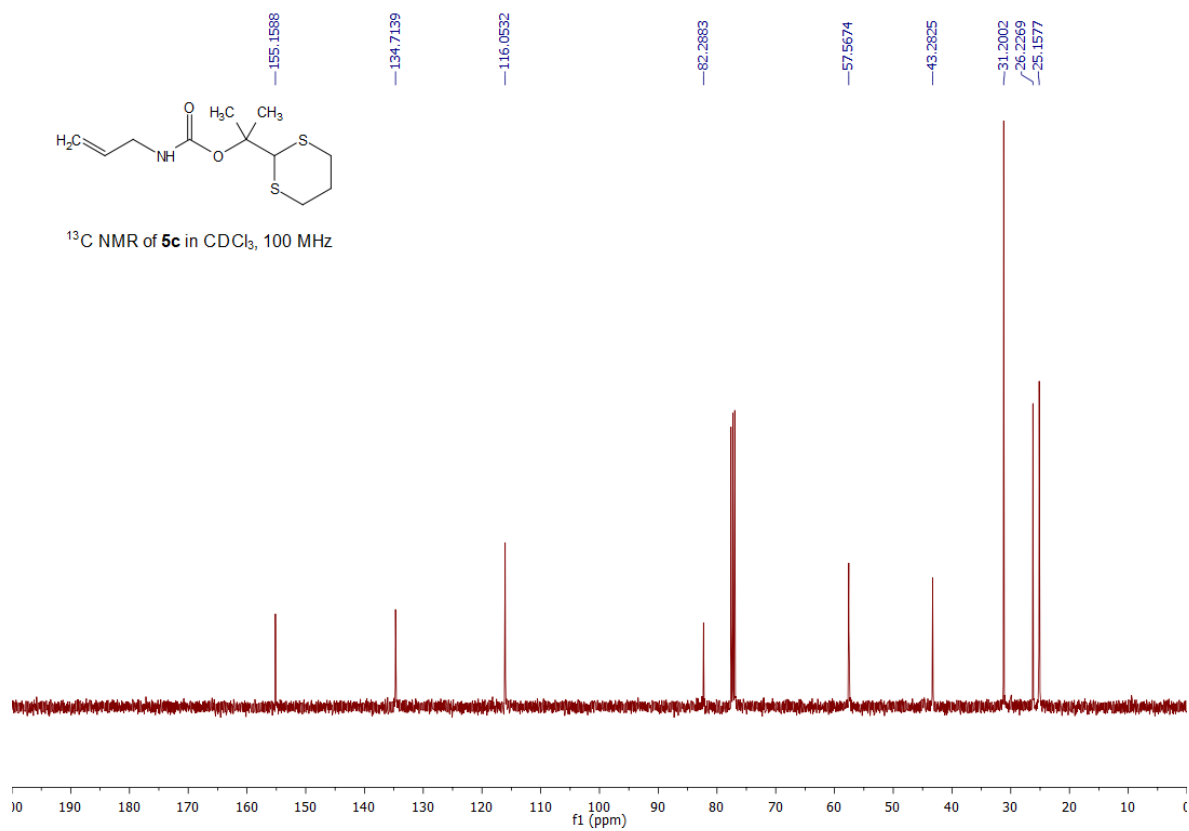

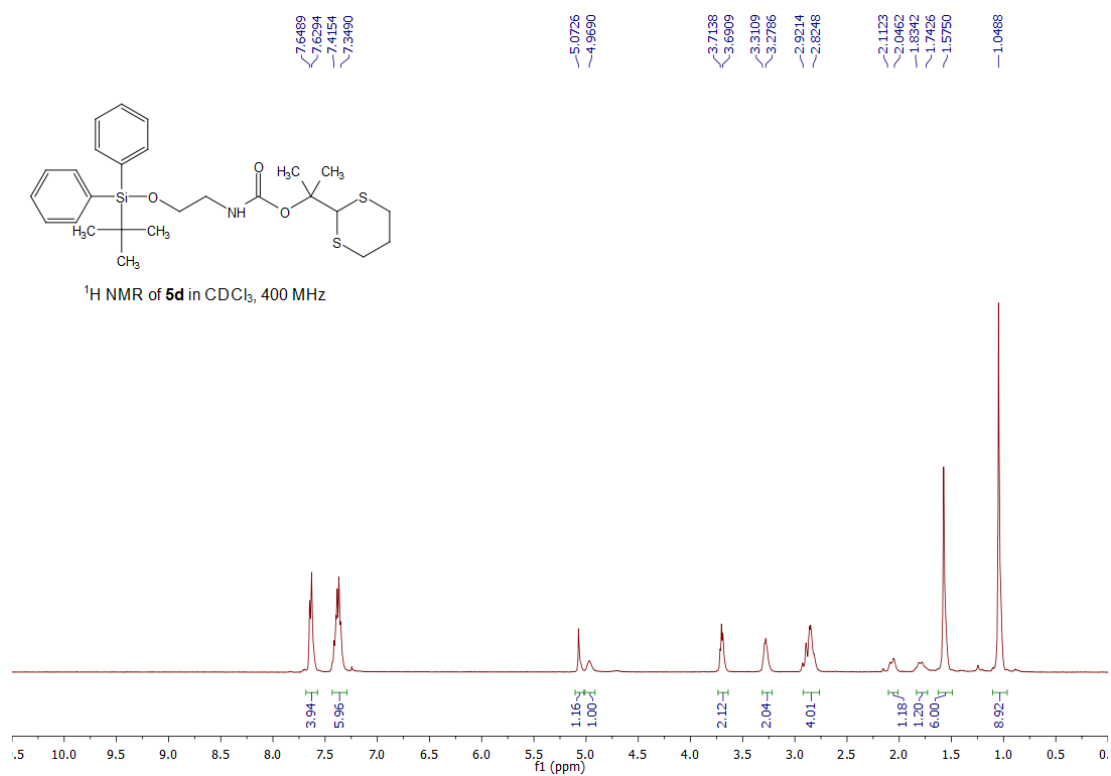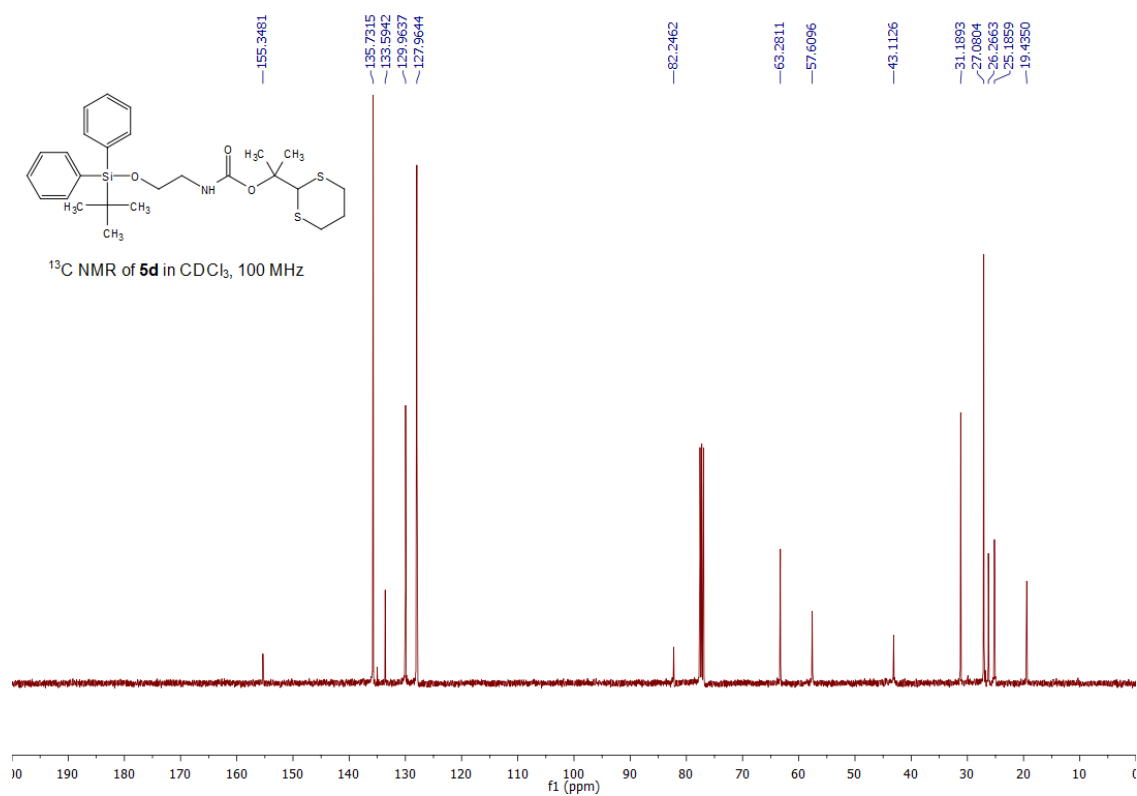

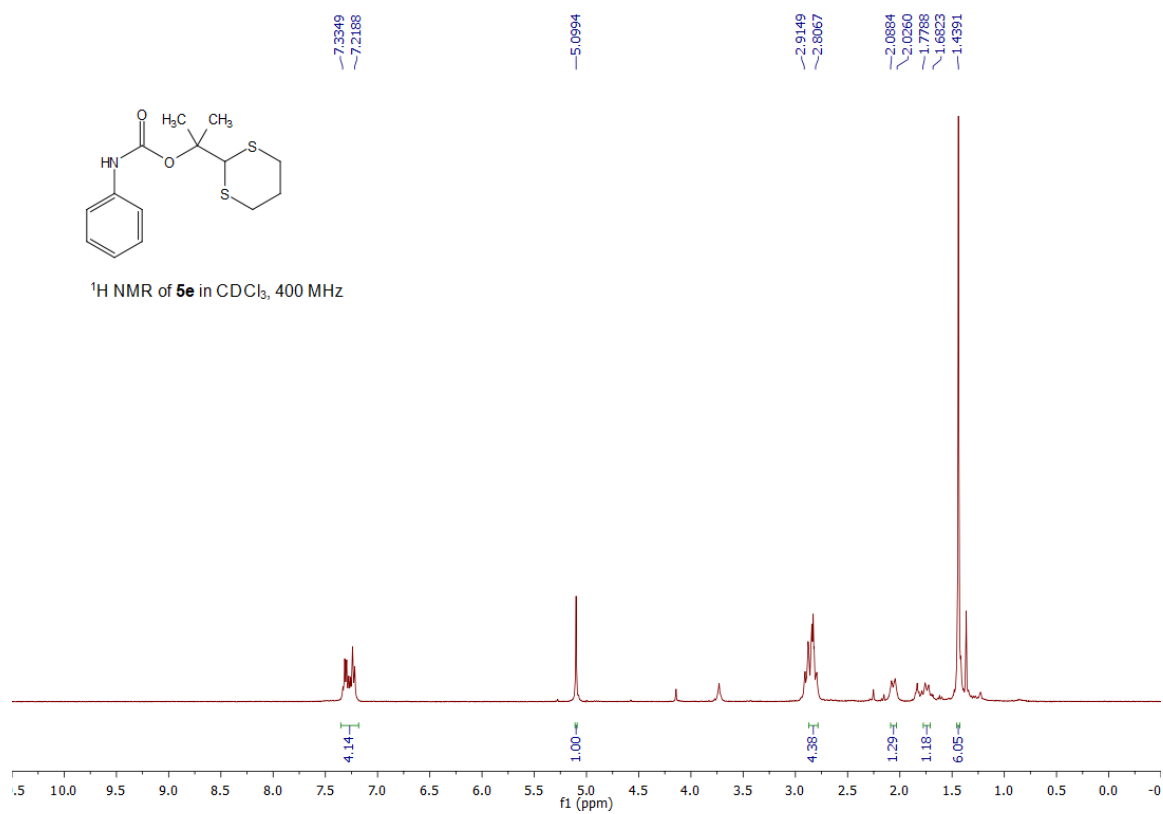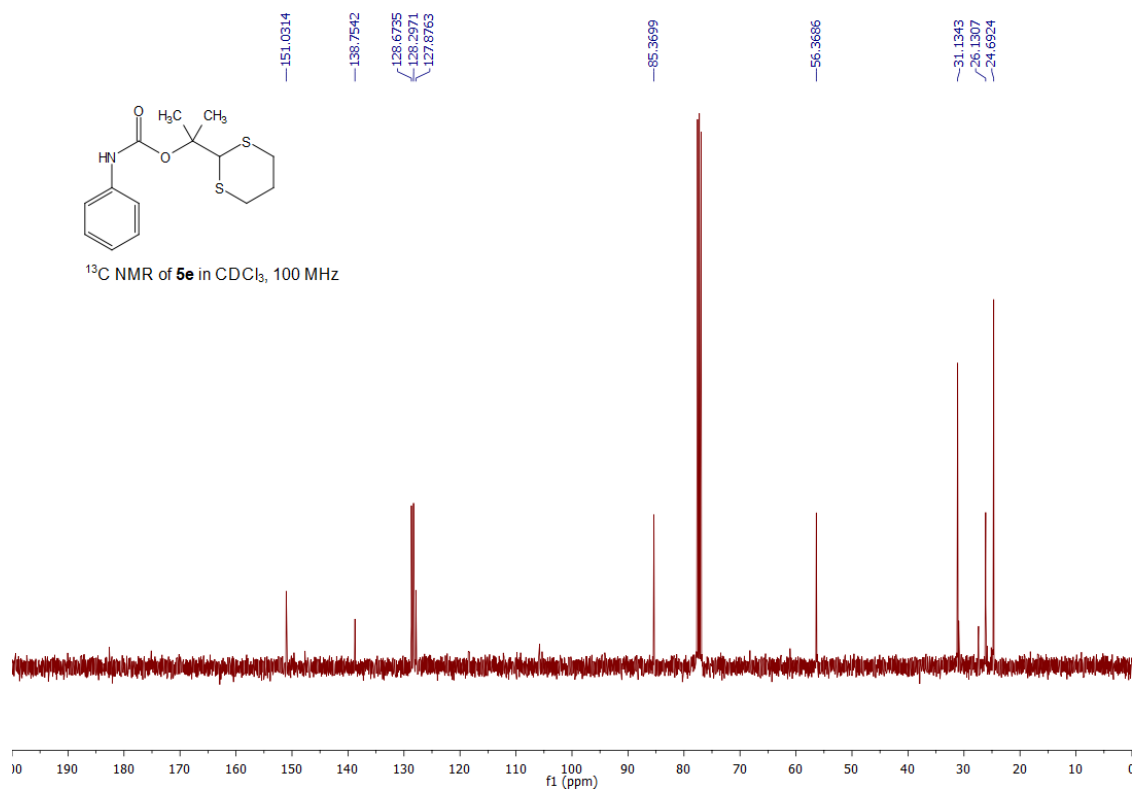

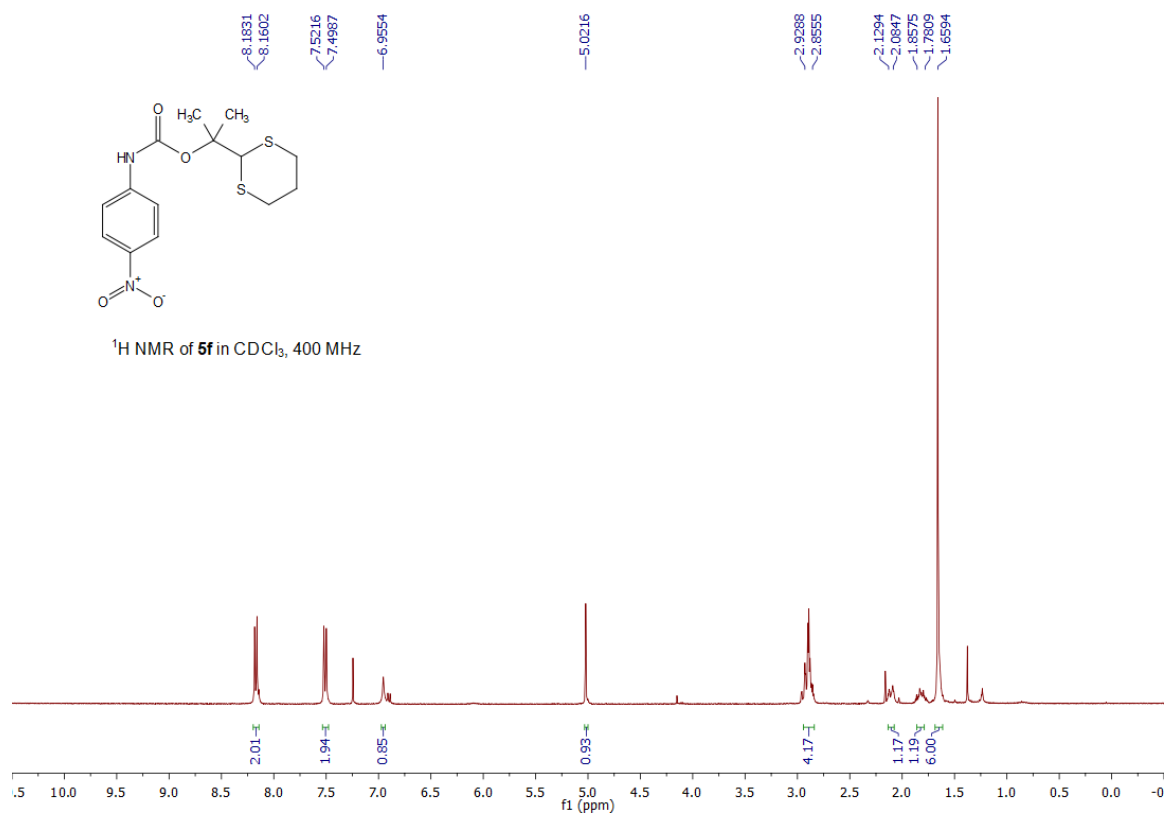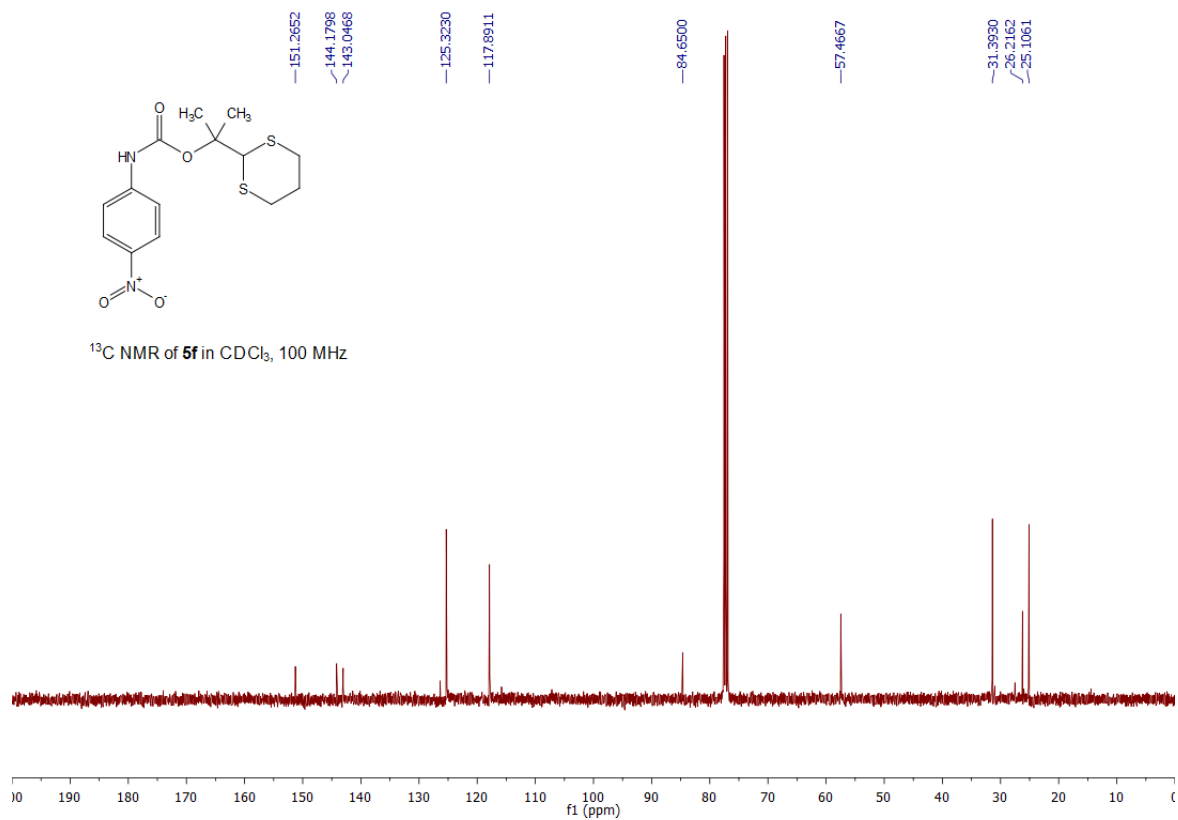

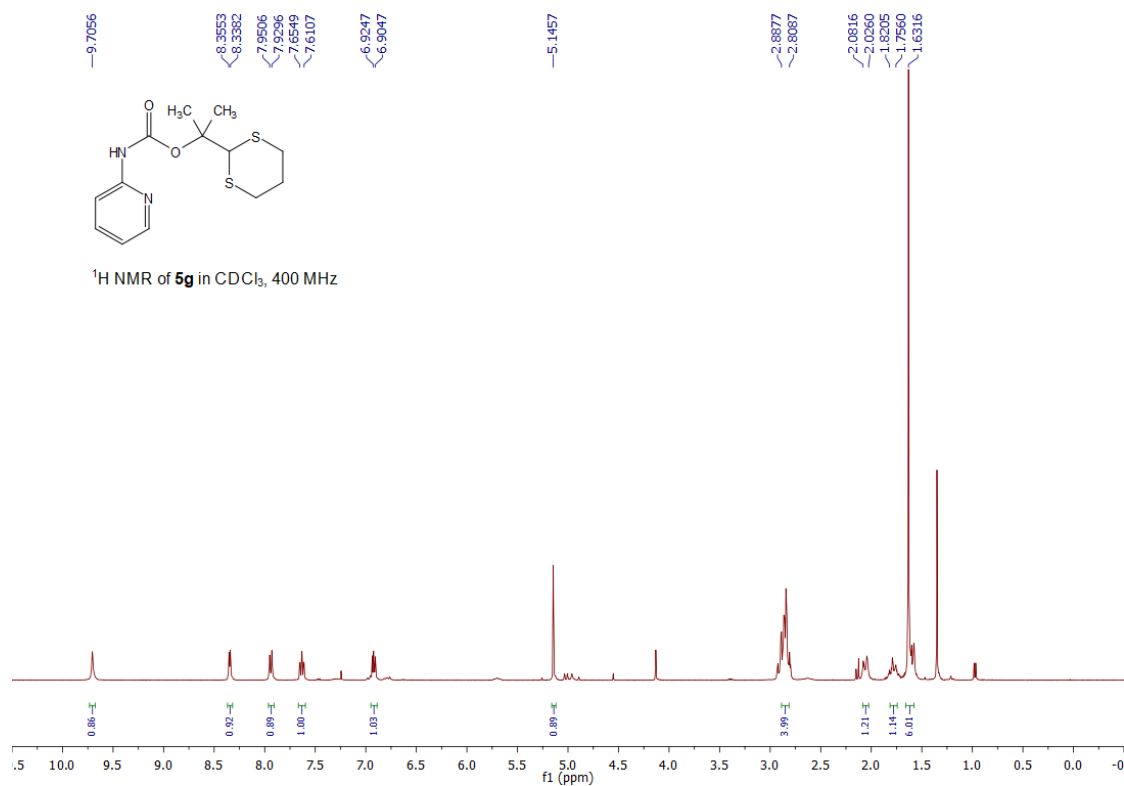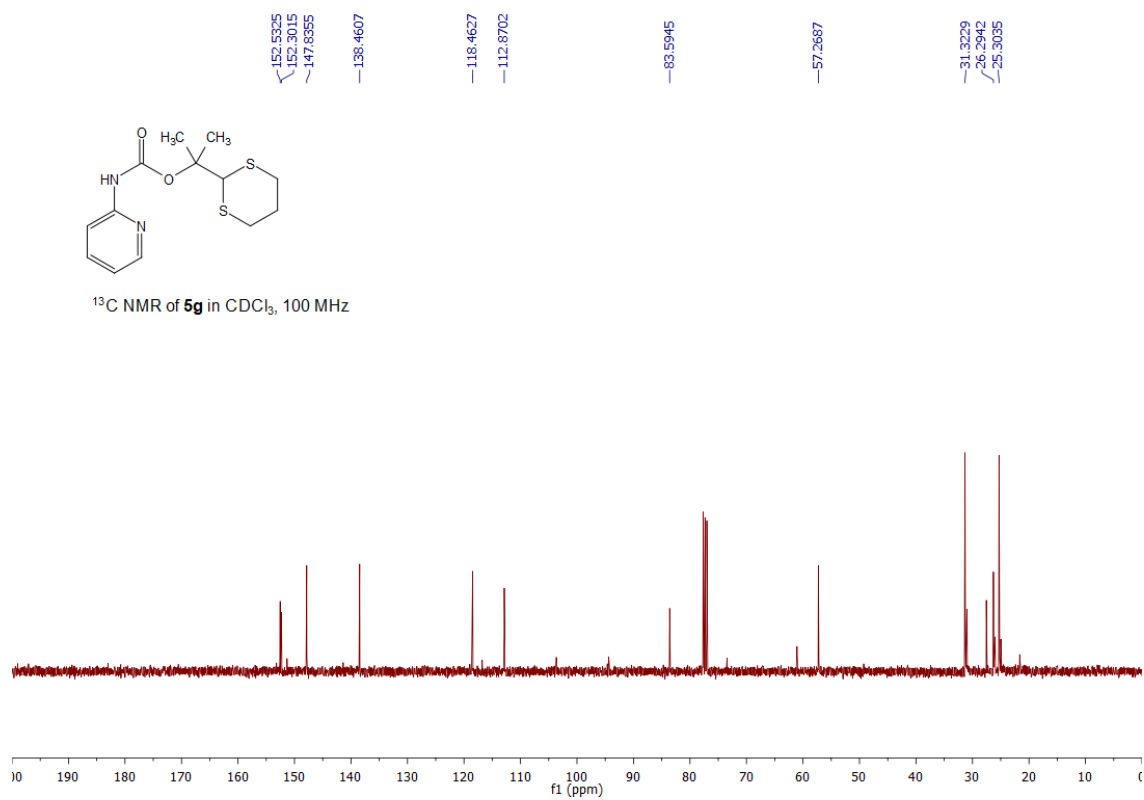

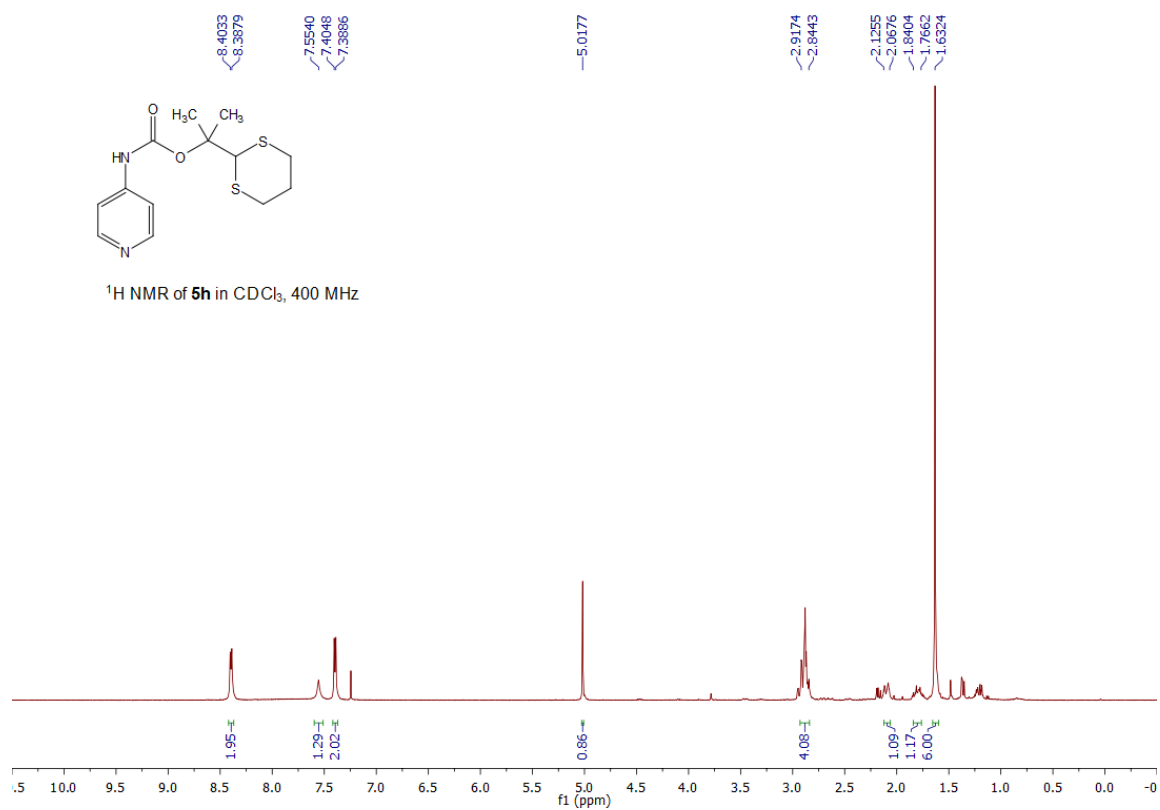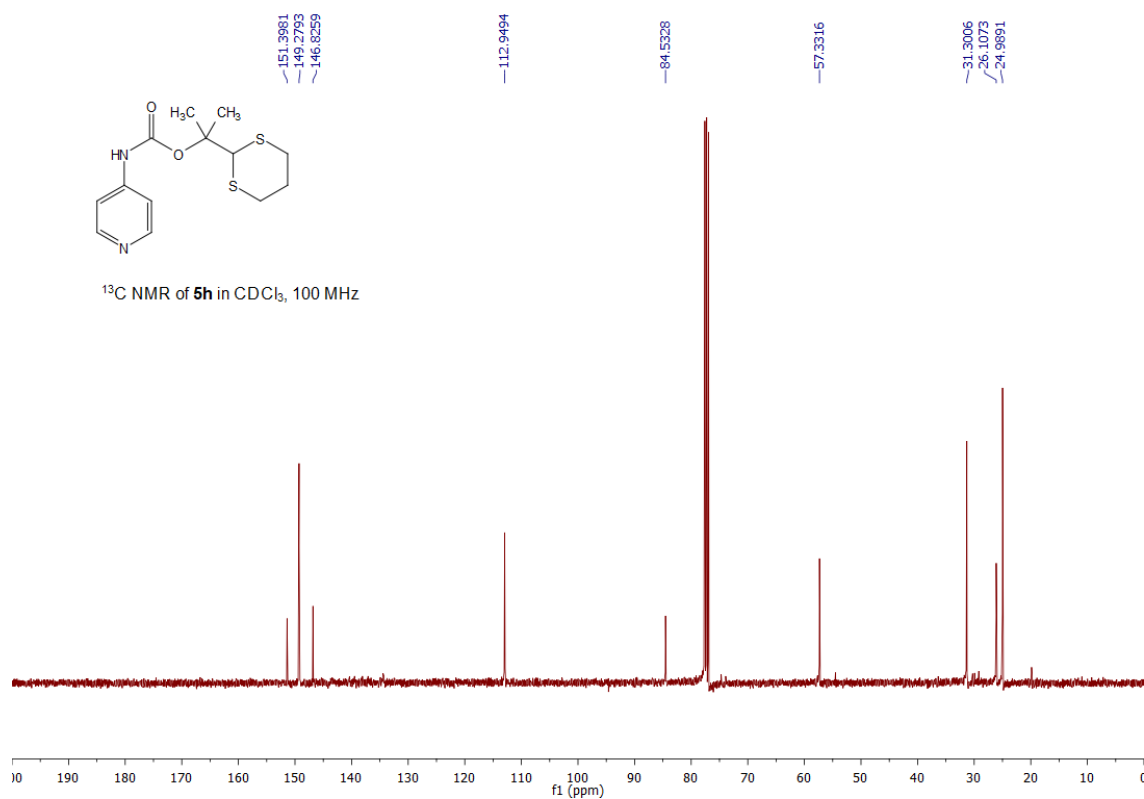

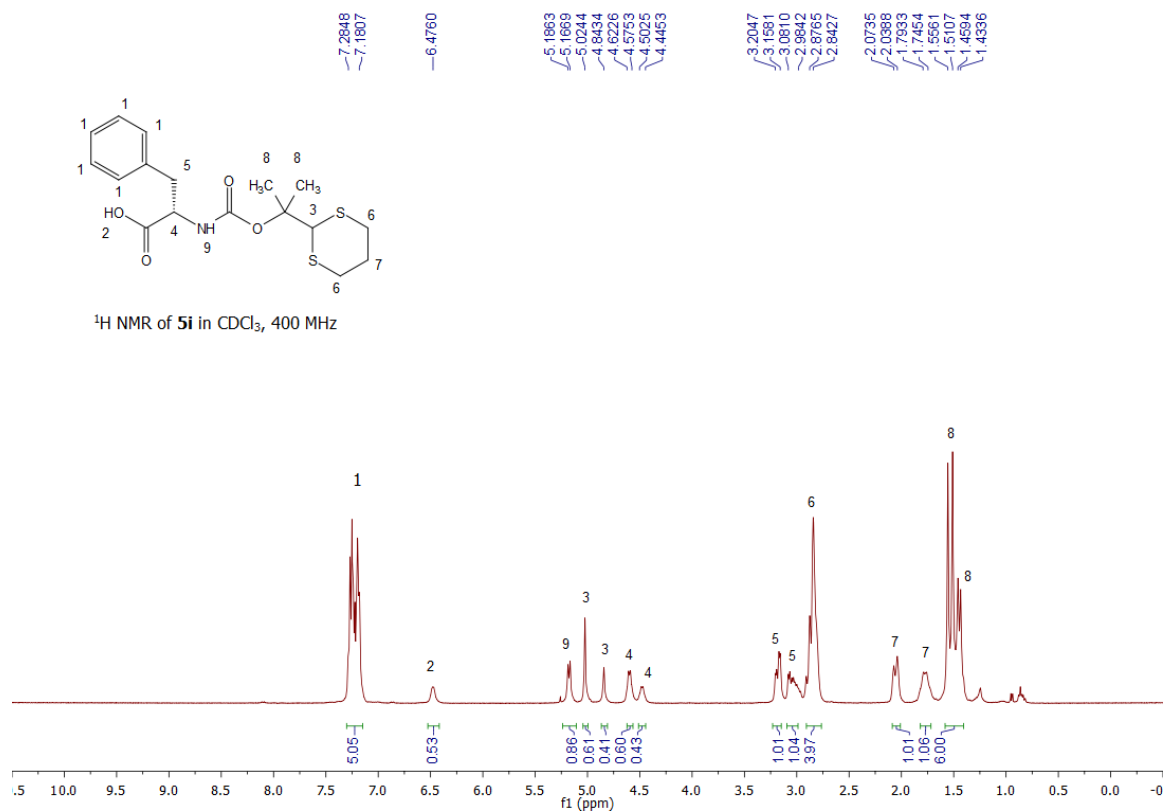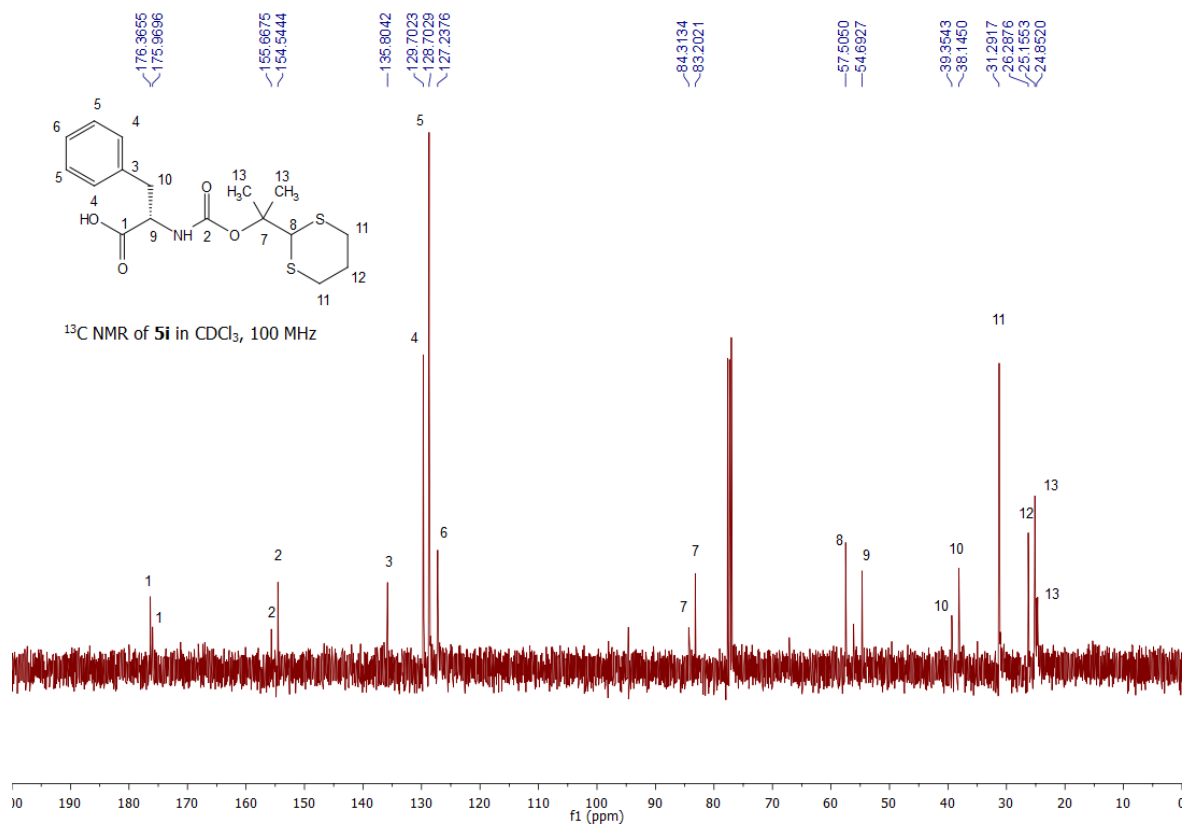

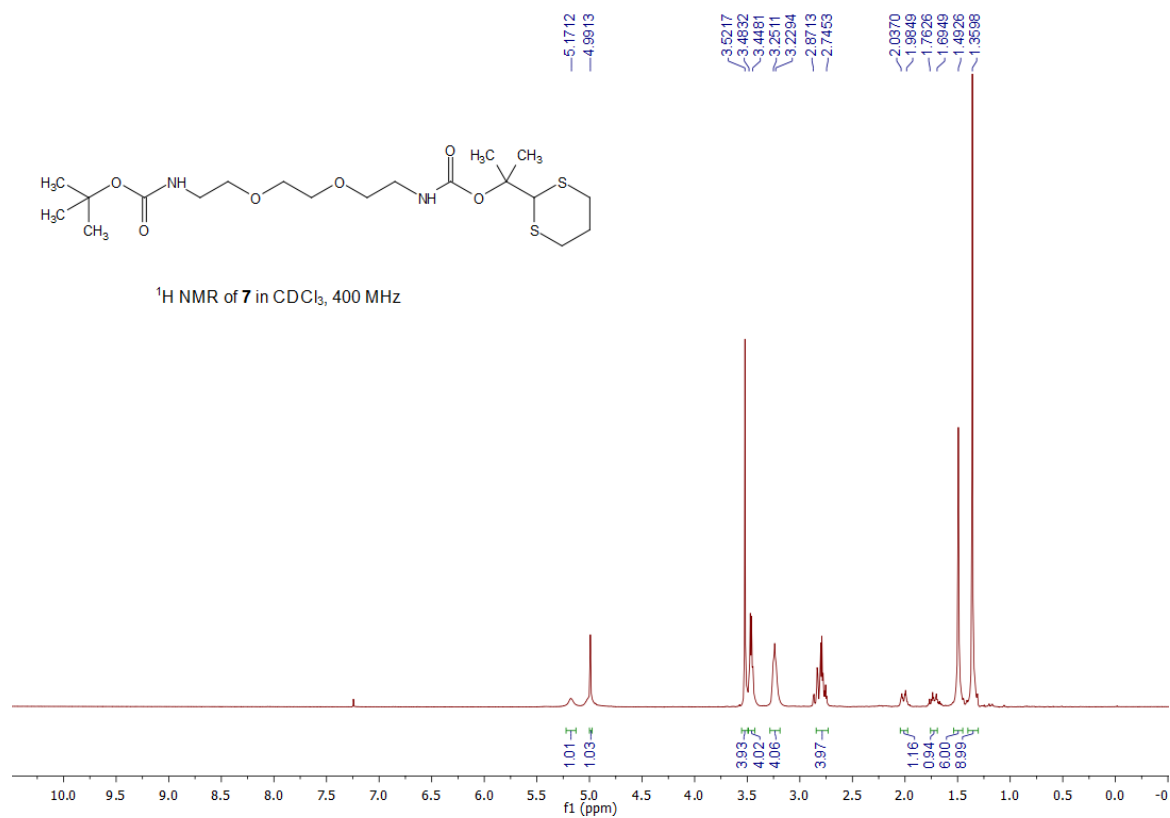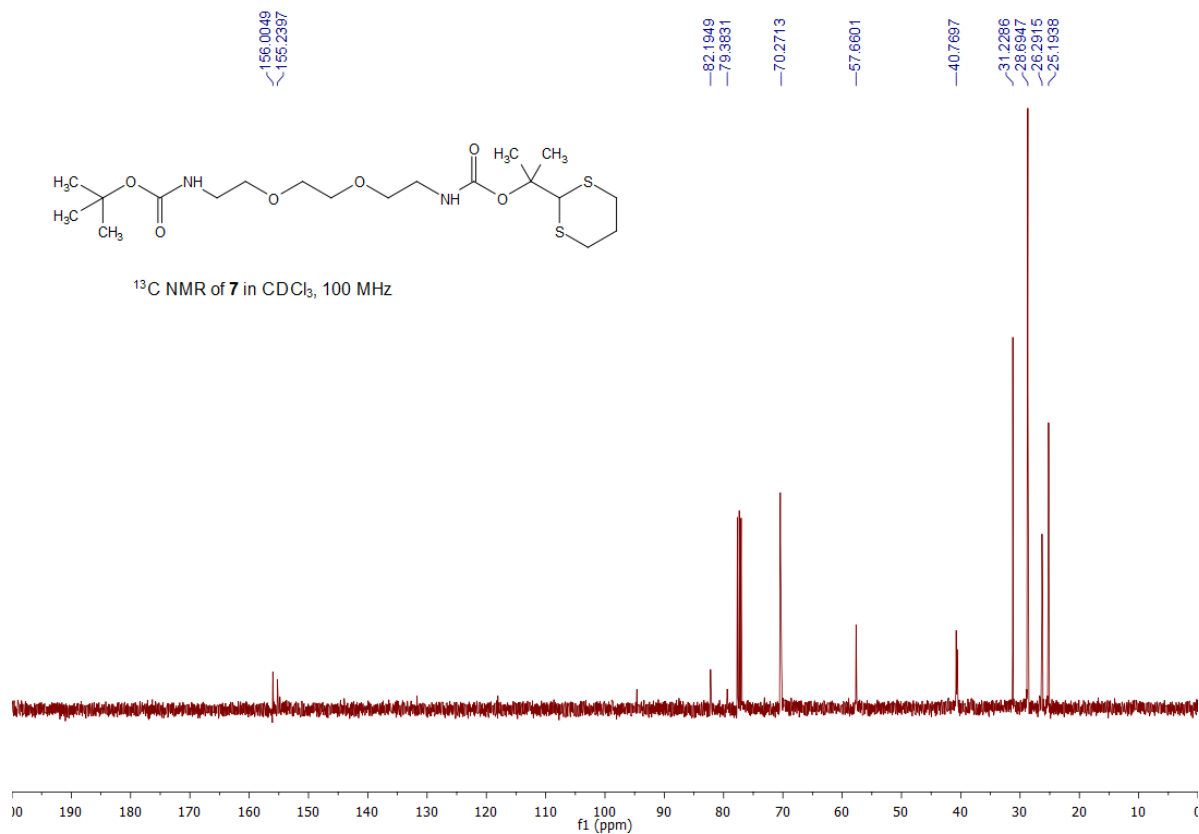

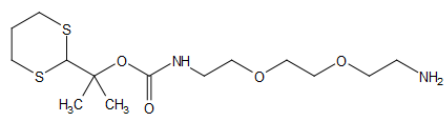

$^1\text{H}$  NMR of **8** in  $\text{CDCl}_3$ , 400 MHz

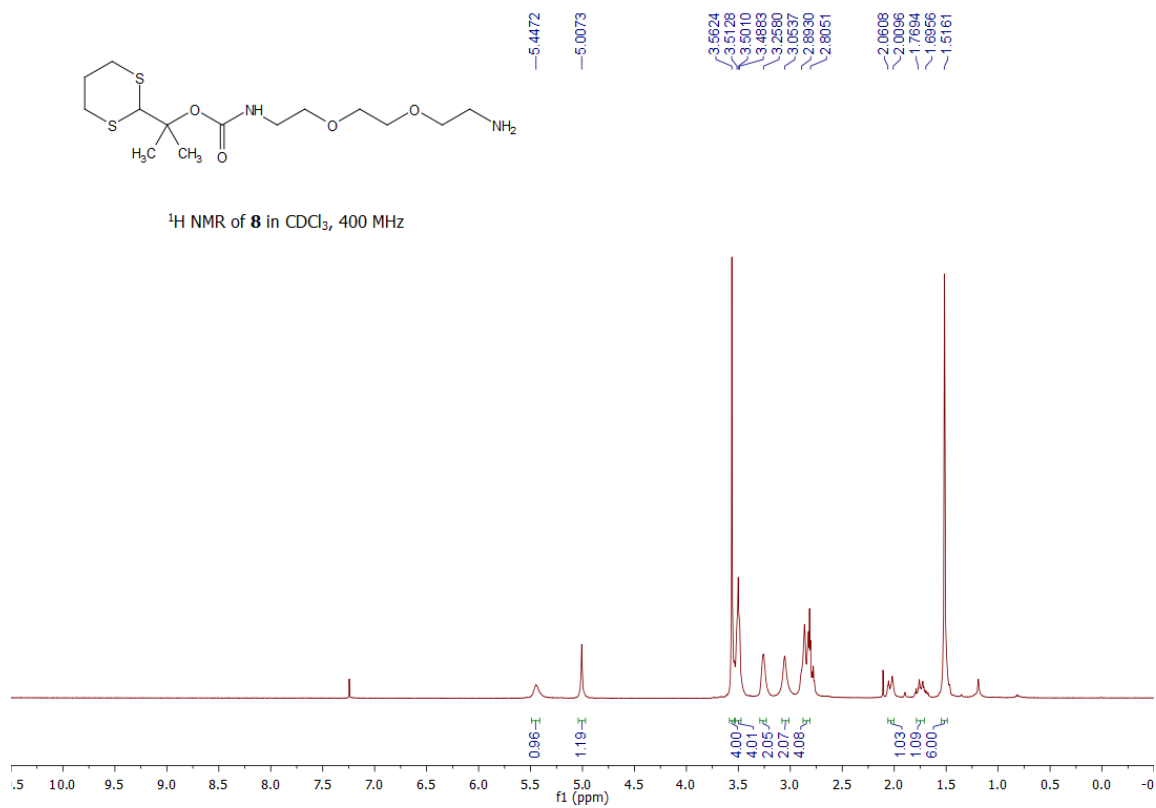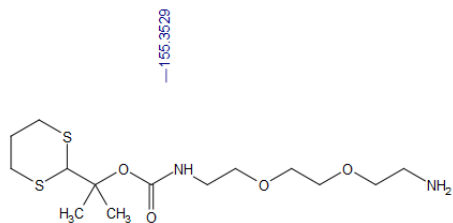

$^{13}\text{C}$  NMR of **8** in  $\text{CDCl}_3$ , 100 MHz

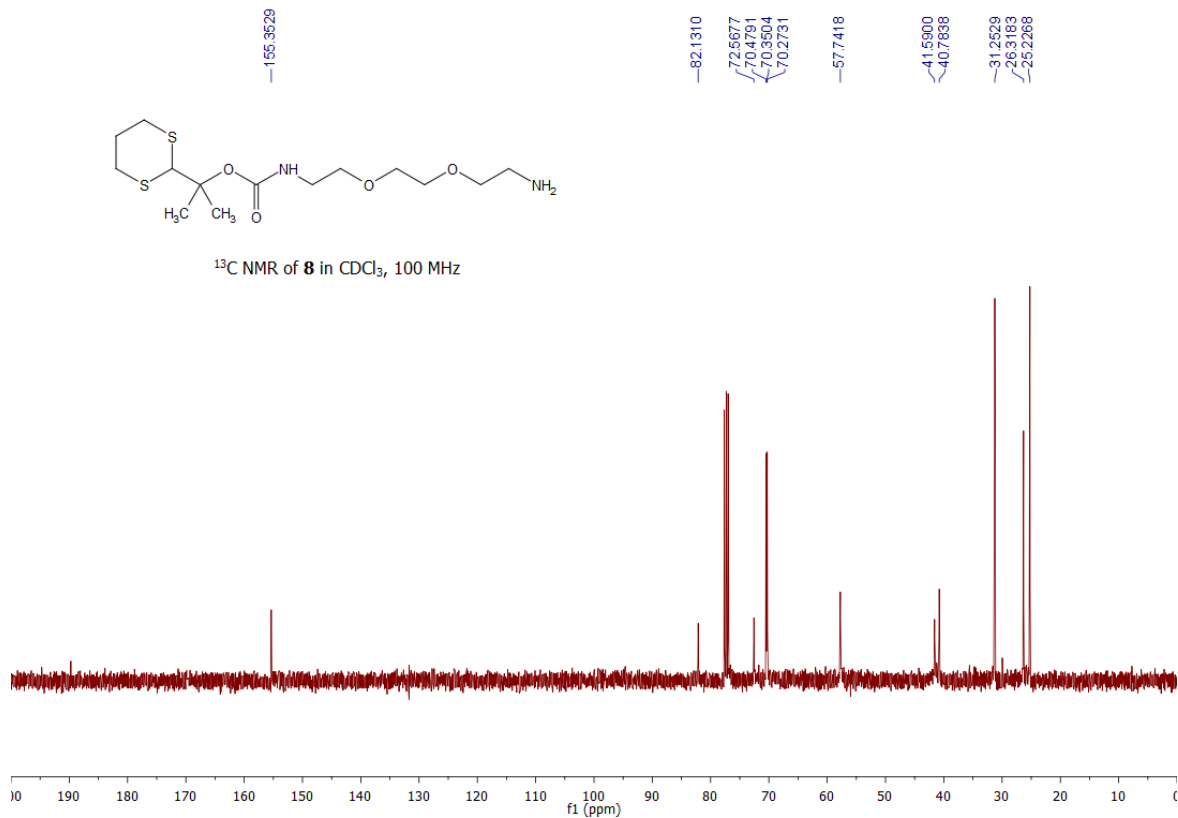

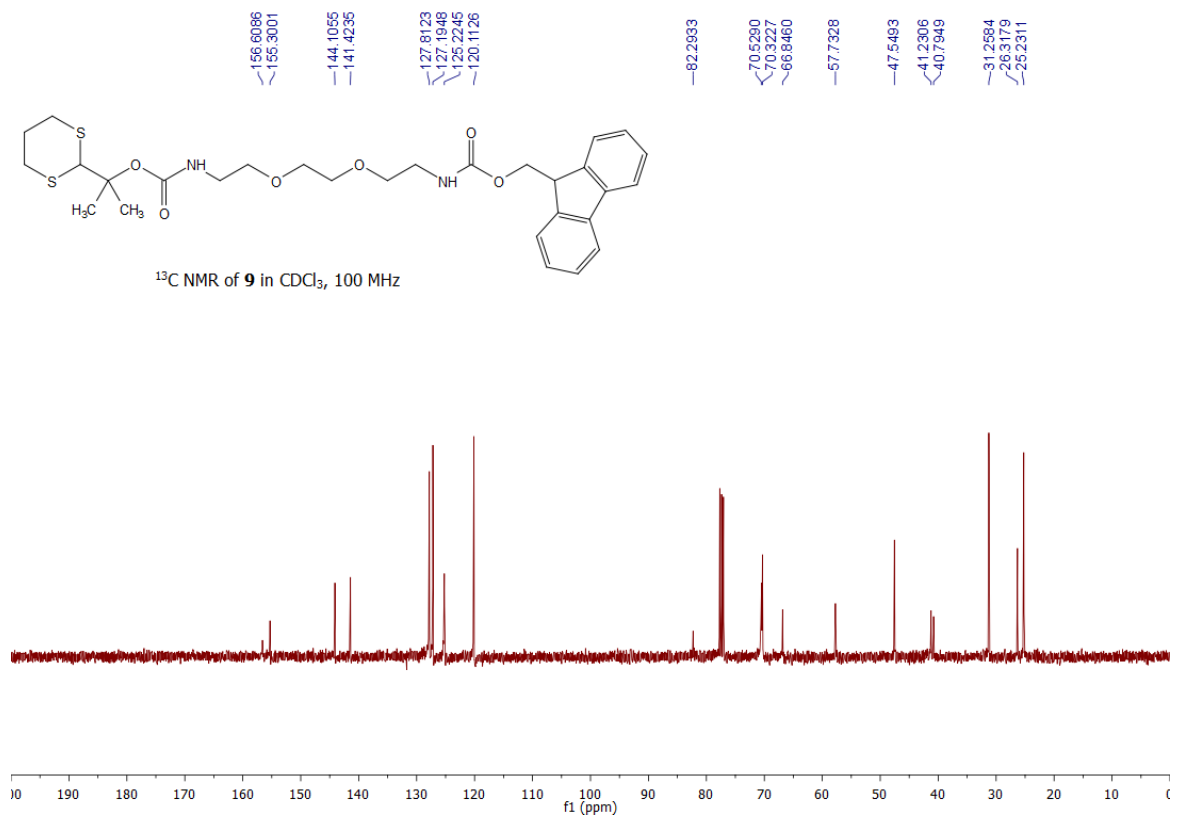

Supplement: Additional file 1 [file 1860-5397-14-149-S1.pdf]
